# Supplementary material
Source: Elsevier journal article supplement (https://www.sciencedirect.com/science/article/pii/S2667049621000703)
Supplement: mmc1 [file S2667049621000703:mmc1.pdf]

## Síntomas cognitivos post-COVID

Miren Altuna<sup>1,2</sup>, M<sup>a</sup> Belén Sánchez-Saudinós<sup>1,2</sup>, Alberto Lleó<sup>1,2\*</sup>

(1) Sant Pau Memory Unit. Hospital de la Santa Creu i Sant Pau – Biomedical Research Institute Sant Pau – Universitat Autònoma de Barcelona. Barcelona, Spain

(2) Centre of Biomedical Investigation Network for Neurodegenerative Diseases (CIBERNED), Madrid, Spain

Correspondencia:

Alberto Lleó.

Email: [alleo@santpau.es](mailto:alleo@santpau.es)

### **Resumen:**

Introducción: La infección por SARS-Cov2 con frecuencia causa síntomas neurológicos. Los síntomas cognitivos se encuentran entre los síntomas más frecuentes y pueden persistir más allá de la fase aguda de la infección.

Metodología: Revisión narrativa de la literatura.

Resultados: El riesgo de padecer síntomas cognitivos es mayor en pacientes hospitalizados, especialmente en pacientes críticos. Los síntomas cognitivos post-COVID, a diferencia de los que aparecen en otros cuadros virales, se han observado en pacientes con infección leve y presentan algunos rasgos atípicos. La duración de la sintomatología cognitiva puede ser superior a otros procesos infecciosos y afectar con mayor frecuencia a personas jóvenes. Los síntomas cognitivos post-COVID comparten rasgos comunes con los descritos en el síndrome de la fatiga crónica, incluyendo un perfil similar de síntomas afectivos asociados. Los tests rápidos de cribado de deterioro cognitivo tienen un rendimiento diagnóstico subóptimo y son necesarios criterios estandarizados para un correcto diagnóstico.

El deterioro cognitivo post-COVID puede ocasionar un impacto significativo en la calidad de vida y en la autonomía funcional del paciente, de forma independiente al resto de síntomas post-COVID. En la actualidad no existen tratamientos específicos aprobados para el deterioro cognitivo post-COVID, aunque la estimulación cognitiva puede ser útil en algunos pacientes.

**Conclusiones:** Los síntomas cognitivos post-COVID son frecuentes, y con asiduidad se asocian a otros síntomas sistémicos. Una evaluación neuropsicológica puede ser de utilidad para el diagnóstico y para cuantificar su severidad y pronóstico a largo plazo. Una caracterización detallada e individualizada del deterioro cognitivo permite establecer medidas de tratamiento.

**Palabras clave:** niebla cerebral, síntomas cognitivos, COVID-19.

#### Post-COVID cognitive symptoms

##### **Abstract:**

**Introduction:** SARS-Cov2 infection frequently causes neurological symptoms. Cognitive symptoms are among the most frequent symptoms and may persist beyond the acute phase of infection.

**Methodology:** Narrative review of the literature.

**Results:** The risk of developing cognitive symptoms is higher in hospitalized patients, especially in critically ill patients. Post-COVID cognitive symptoms, unlike those appearing in other viral illnesses, have been observed in patients with mild infection and present some atypical features. The time duration of cognitive symptomatology may be longer than in other infectious processes and more frequently affects young people. Post-COVID cognitive symptoms share common features with those described in chronic fatigue syndrome, including a similar profile of associated affective symptoms. Short screening tests for cognitive impairment have suboptimal diagnostic performance and standardized criteria are necessary for a correct diagnosis.

Post-COVID cognitive impairment can have a significant impact on the patient's quality of life and functional autonomy, independently of other post-COVID symptoms. There are currently no specific treatments approved for post-COVID cognitive impairment, although cognitive stimulation may be useful in some patients.

**Conclusions:** Post-COVID cognitive symptoms are common and are often associated with other systemic symptoms. A neuropsychological evaluation may be useful for diagnosis and to quantify their severity and long-term prognosis. A detailed and individualized assessment of cognitive impairment could allow the design of an optimized treatment plan for each subject, with a greater chance of success.

**Key words:** brain fog, cognitive symptoms, COVID-19.

## **Introducción**

La infección por SARS-Cov2 puede asociarse a numerosos síntomas neurológicos, tales como encefalitis, eventos cerebrovasculares, delirium, y síntomas neuromusculares entre otros (1). En los primeros meses de 2020 las complicaciones neurológicas descritas se centraron en cuadros neurológicos floridos en pacientes hospitalizados, habitualmente en unidades de cuidados intensivos (UCI), afectados de cuadros de COVID grave.

Se han postulado distintos mecanismos de daño neurológico incluyendo la invasión viral directa del sistema nervioso central (SNC) y otros no vinculados con la invasión directa pero sí con una combinación de lesión endotelial, intensa actividad inflamatoria periférica y un estado protrombótico (2,3)(Figura 1). Se ha descrito que el SARS-Cov2 puede actuar a través de una invasión directa mediante la mucosa nasal (4) y fibras olfatorias, y también por vía hematógica y linfática (3,5,6). La proteína S de SARS-Cov2 tiene la capacidad de unirse al receptor ACE2 (enzima convertidora de angiotensina 2), ampliamente expresado en neuronas, astrocitos y oligodendrocitos, y penetrar en las células induciendo disfunción mitocondrial (7,8). A pesar de que se ha constatado la presencia de proteínas virales de SARS-Cov2 en pares craneales bajos y neuronas del tronco-encéfalo, su ausencia o presencia no parece tener correlato con la severidad de los síntomas y de hecho, en

estudios de necropsia parece más frecuente la detección de cambios inflamatorios en tejido cerebral más que la propia detección del propio virus (9). A su vez, se ha constatado que la actividad inflamatoria periférica que acontece en contexto de infección por SARS-Cov2 se puede medir mediante un aumento marcado de citoquinas en sangre, lo que condiciona un daño tisular mediado por citoquinas en diversos órganos, entre ellos el sistema nervioso.

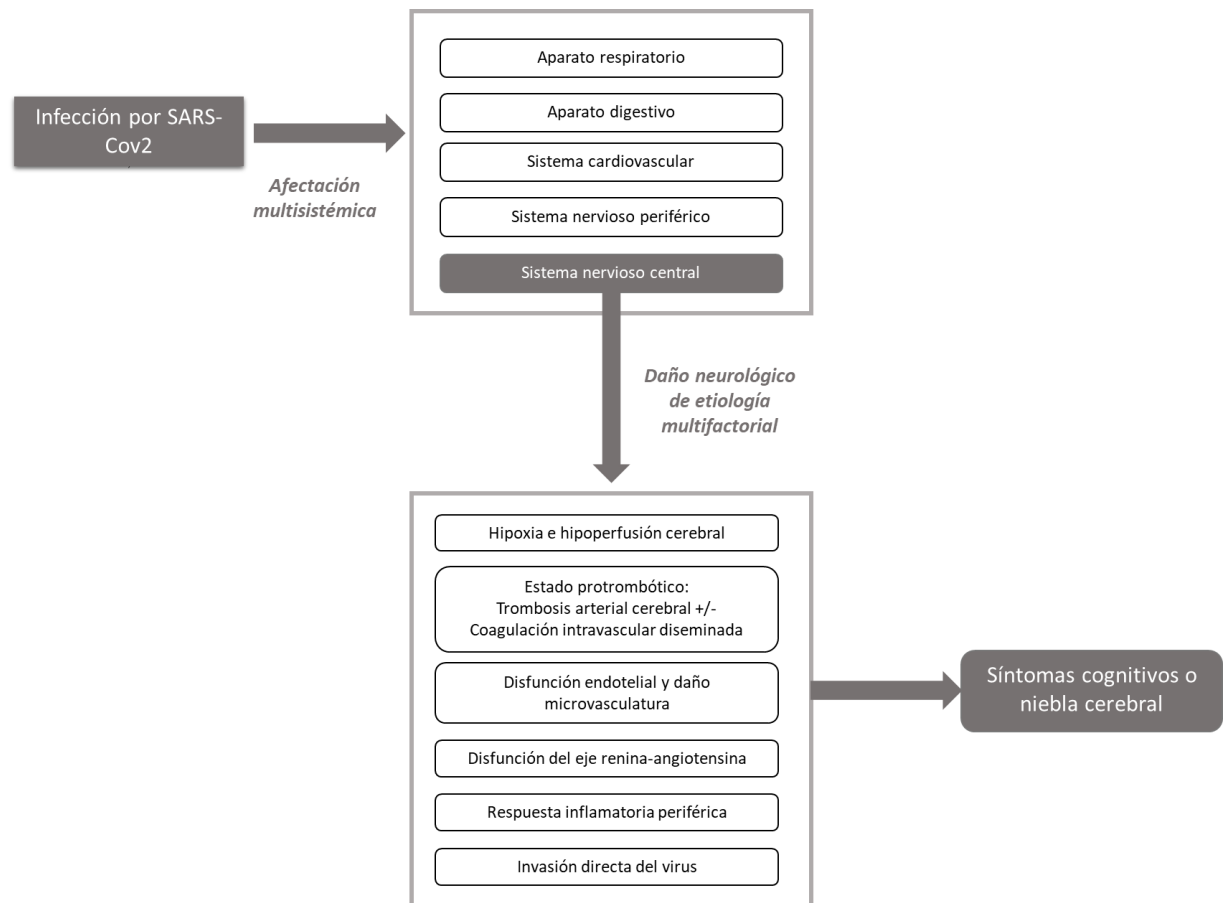

**Figura 1:** La infección por SARS-Cov2 produce una afectación multisistémica. El daño neurológico se produce por una combinación de distintos mecanismos indirectos y no sólo por la infección viral directa. Los síntomas cognitivos de forma aislada o en combinación con otros síntomas neurológicos son frecuentes.

Con la evolución de la pandemia se ha observado que, además de las secuelas neurológicas de pacientes hospitalizados con cuadros graves, pacientes con cuadros menos graves también pueden presentar síntomas neurológicos persistentes como cefalea, anosmia, ageusia, y síntomas cognitivos, afectivos y conductuales. Un estudio reciente muestra que hasta un tercio de pacientes presentan síntomas

neurológicos o psiquiátricos los primeros 6 meses tras un diagnóstico de COVID-19 (10).

Los síntomas cognitivos como parte del COVID, aparecen descritos de forma tardía entre la sintomatología típica del COVID, y han cobrado más importancia durante el año 2021 cuando han aflorado este tipo de secuelas (11,12). Estas alteraciones en algunos casos pueden conllevar repercusión en la autonomía funcional y/o laboral de la persona (13) y en su calidad de vida (14). Por ello, es esencial un diagnóstico temprano y riguroso de dichos síntomas.

En esta revisión abordaremos el deterioro cognitivo post-COVID, profundizando en sus características, correlatos biológicos y tratamientos.

### **Material y métodos:**

Se ha realizado una búsqueda bibliográfica utilizando la base de datos MedLine a día 1 de octubre de 2021. Como estrategia de búsqueda se ha empleado la siguiente: ((SARS-Cov2) OR (COVID) OR (COVID19)) AND ((cognitive symptoms) OR (brain fog) OR (cognitive impairment)). Se han evaluado artículos originales, incluyendo series de casos clínicos, y revisiones sistemáticas y metaanálisis. Se han considerado sólo artículos escritos en inglés, español o francés con resumen accesible en MedLine. Utilizando dicha estrategia de búsqueda se han identificado 1053 artículos. Tras la lectura del título y del resumen se ha procedido a la lectura completa de 154 artículos que trataban como tema no necesariamente principal la presencia de síntomas cognitivos en fase aguda de la infección o post-covid, y/o la repercusión cognitiva de la infección por SARS-Cov2 en pacientes con deterioro cognitivo de etiología neurodegenerativa previamente diagnosticada. La lectura crítica de los artículos en cuestión ha permitido acotar el número de los trabajos finalmente incluidos en esta revisión. Se han desestimado casos clínicos y series de casos si otro tipo de artículos con mayor evidencia científica aportaban la misma información pero con mayor rigor. Los artículos de revisión y artículos originales sólo han sido incluidos si considerábamos que aportaban información específica en referencia a síntomas cognitivos y no de forma genérica dentro del espectro de síntomas neurológicos post-covid.

### **Niebla cerebral y deterioro cognitivo**

El término “niebla cerebral” se ha utilizado de forma genérica para referirse a una constelación de síntomas cognitivos leves de diferente etiología. Este término no es

exclusivo de la infección por SARS-Cov2, y ha sido previamente descrito en otros procesos post-infecciosos y/o en el contexto del síndrome de fatiga crónica, entre otros. En el contexto de la pandemia COVID-19, este término se ha usado para describir dificultades de concentración, pérdida de memoria y en ocasiones confusión (15,16), hipersensibilidad a la luz y a los ruidos, y tinnitus (17). Junto con la fatiga, los síntomas cognitivos son de los síntomas más frecuentes que persisten tras 4 semanas de la infección por SARS-Cov2. La coexistencia de síntomas afectivos, como ansiedad, labilidad emocional y disforia, es frecuente. El cuadro cognitivo post-COVID recuerda a los síntomas cognitivos que se observan en el síndrome de fatiga crónica (18). No se ha descrito una mayor predisposición en relación al género para el desarrollo de síntomas cognitivos post-COVID, a diferencia de la fatiga que sí se ha asociado más a mujeres (16). La fatiga y los síntomas afectivos, ansiosos y depresivos, pueden influir en la percepción que los pacientes tienen de su función cognitiva (18). La presencia de estos síntomas puede tener un impacto en la calidad de vida y en la esfera socioeconómica y laboral de los pacientes (19).

### **Paciente hospitalizado grave**

La mayoría de los pacientes con cuadros graves de COVID-19 sufren de un distrés respiratorio grave. El deterioro cognitivo en pacientes con distrés respiratorio de cualquier origen está ampliamente descrito en la literatura (20,21). La prevalencia de deterioro cognitivo tras un distrés respiratorio en el momento del alta hospitalaria oscila entre 70-100% y puede alcanzar el 80% al año y al 20 % a los 5 años y se asocia a una limitación funcional. El distrés respiratorio puede tener causas muy diversas y los factores implicados en el deterioro cognitivo pueden variar en función de la etiología. No obstante, los factores más relevantes en el origen del deterioro cognitivo son la hipoxia, la inflamación, el delirium, la hipoperfusión, y la alteración de la barrera hematoencefálica (21). En estos casos, se recomienda poner especial atención al tratamiento de los factores modificables, como un buen control de los fármacos sedantes y la ventilación mecánica, evitar la inestabilidad hemodinámica y el tratamiento precoz del delirium. En el caso del COVID, el delirium en fase aguda se puede presentar hasta en el 30% de los pacientes ingresados, siendo más frecuente en los pacientes críticos (22). La mayor frecuencia del delirium en este contexto podría estar vinculada con la invasión

directa del SNC por SARS-Cov2, además de por la presencia de cambios inflamatorios, hipoperfusión sistémica, ventilación mecánica e inmovilización prolongada con necesidad de sedoanalgesia, y por un mayor aislamiento social (23). La duración del delirium en pacientes con distrés respiratorio o shock es un factor importante para el desarrollo posterior de síntomas cognitivos prolongados (24). La mayoría de las series de casos de deterioro cognitivo post-COVID descritos hasta la actualidad se centran en pacientes que han requerido UCI u hospitalización por COVID grave (25). En estas series, los métodos de evaluación cognitiva son variables y pueden ir desde una encuesta hasta una evaluación telefónica por lo que es difícil determinar la prevalencia real del deterioro cognitivo post-COVID en esta población. El momento de la evaluación de los síntomas también varía entre los trabajos, existiendo más trabajos centrados en la fase aguda correspondiente al momento del ingreso hospitalario. No obstante, en las series publicadas los síntomas cognitivos son frecuentes y pueden llegar hasta el 100 % en algunos de ellos (25). Se ha descrito que los pacientes que requieren oxigenoterapia o UCI presentan déficits más marcados que aquellos que no (26). Se ha señalado que hasta un 69% de ingresados en UCI por COVID presentan agitación en el momento de la extubación y de estos, el 65% sintomatología confusional tras la retirada de bloqueantes musculares y extubación, superior a lo que acontece en otras causas de distrés respiratorio agudo (27). Un estudio reciente realizado a través del análisis de la historia médica electrónica en un gran número de sujetos, confirma que la frecuencia de demencia en los primeros 6 meses tras el COVID es mayor que la que se produce con otros virus respiratorios tanto en pacientes hospitalizados como en los que no (10). En este estudio un 2,6 % de sujetos son diagnosticados de demencia en los primeros 6 meses tras el COVID y aumenta a un 4,7% si han presentado encefalopatía por COVID.

Las personas con estancia en UCI por distrés respiratorio agudo presentan con mayor frecuencia síndrome de estrés postraumático, ansiedad y síntomas depresivos (34%, 34% y 29%, respectivamente), síntomas que a su vez tienen un impacto negativo directo sobre las funciones cognitivas (28,29). Los síntomas psicóticos no parecen ser más prevalentes en caso de infección por SARS-Cov2 en comparación a otras infecciones virales de curso grave. En resumen, la prevalencia de deterioro cognitivo es alta en los pacientes graves con un impacto funcional y

laboral. De hecho, hasta un tercio de los sujetos con COVID que han requerido estancia en UCI con ventilación mecánica no han vuelto a ser activos laboralmente al año de ingreso (24).

### **Paciente con COVID leve**

La infección por SARS-Cov2 cursa de forma asintomática o con síntomas leves pseudogripales en el 80-85% de los casos. Aunque los pacientes con ingreso hospitalario y sobre todo aquellos con estancia en UCI tienen mayor riesgo de síntomas cognitivos, las personas con curso leve de la infección también pueden presentarlos, incluso aquellos con infección inicialmente asintomática (16).

En los últimos meses se ha descrito la existencia de disfunción ejecutiva y en menor medida mnésica persistente (tras al menos 3 meses desde la infección) en personas jóvenes sin otras comorbilidades con una forma leve de COVID que no requirió ingreso hospitalario (30,31). Varios trabajos han comparado los síntomas cognitivos post-COVID con otros síndromes post-virales, como por ejemplo el virus Epstein-Barr. La infección por SARS-Cov2 tiene algunas peculiaridades, ya que la presencia de síntomas cognitivos no tiene una relación temporal clara con otros síntomas como los afectivos o con la fatiga ni con la severidad de estos. En la infección por SARS-Cov2 los síntomas cognitivos pueden persistir más tiempo que el resto de síntomas y su evolución es independiente (32).

Un trabajo reciente que ha incluido más de 3700 encuestas administradas online ha estudiado la prevalencia de síntomas cognitivos post-COVID y su evolución posterior. El estudio incluyó personas jóvenes de entre 30 y 60 años, y la mitad pasaron una infección leve. El 85.1% de los respondedores refirió síntomas de niebla cerebral con inicio a partir de la primera semana de la infección con un pico máximo a los 3 meses. En el 55.5%, los síntomas persistieron al 7º mes. El 86.2% refirió empeoramiento de su rendimiento laboral (33). A su vez, un estudio de base poblacional que incluye adultos mayores de 40 años cognitivamente intactos, objetivó un detrimento en la puntuación del test de evaluación cognitiva Montreal (MoCA) tras la infección leve por COVID-19 (34).

En resumen, a diferencia de otros síndromes post-virales, los síntomas cognitivos post-COVID son más frecuentes en casos leves, y pueden ser persistentes en algunos casos produciendo impacto laboral o funcional.



## Perfil del deterioro cognitivo post-COVID

La literatura sobre el deterioro cognitivo post-COVID muestra una gran heterogeneidad del perfil del paciente incluido, en el momento y la metodología empleada para su evaluación, así como la ausencia de grupo control en la mayoría de los estudios. Una revisión sistemática sobre las secuelas cognitivas y psiquiátricas del COVID que incluyó 33 estudios, concluye que existe la necesidad de armonizar la evaluación neuropsicológica y de realizar estudios longitudinales (35). El perfil más frecuente de deterioro cognitivo post-COVID es el que afecta a las funciones ejecutivas que puede detectarse tras más de 4 semanas (fase subaguda o de convalecencia) e incluso tras las 12 semanas (síntomatología persistente) del diagnóstico (36). La mayoría de los trabajos publicados utilizan tests de cribado de deterioro cognitivo (p.ej MoCA o el test de Mini Mental -MMSE-) administrados de forma presencial (37–39) o telefónica (40), y en algunos de los estudios se incluye el test de ejecución continua (CPT) como medida computarizada de la atención sostenida (41); y tanto evaluaciones objetivas (26) como autoinformes (42). Estos estudios han identificado dificultades en la atención y en la planificación, lentificación de la velocidad de procesamiento, empeoramiento de la memoria a corto plazo, de la capacidad de abstracción y de la orientación (32), pero también anomia y mayor dificultad para la comprensión de lenguaje oral y escrito, esto último más evidente en los sujetos con estancia en UCI (43). Las dificultades del lenguaje pueden impactar en la capacidad de interacción social y en la capacidad de reinserción laboral de los pacientes. En los estudios con encuestas online masivas la disfunción ejecutiva también es el dominio cognitivo más afectado, si bien hasta el 50.5% de los sujetos señala empeoramiento mnésico a los 7 meses de la infección (33). También se ha descrito, aunque con resultados menos robustos, la afectación de la función visuoespacial (36) (Tabla 1). Una limitación que se observa es que en algunas investigaciones se administran pruebas de cribado a una población joven sin que se disponga de datos normativos para esa franja de edad (32). Además de la sintomatología cognitiva, se han comunicado tasas significativamente más altas de sintomatología psiquiátrica entre los supervivientes del COVID (10). Este mismo estudio revela que la enfermedad mental previa es un factor de riesgo de COVID-19 probablemente ligado a estilos de vida e independiente de los factores de riesgo

físicos conocidos (1,65 veces más riesgo, en todos los estratos de edad y ambos sexos) (10). El riesgo de sufrir depresión y problemas cognitivos se ha relacionado con un peor estado funcional (medido con la escala *Post-COVID-19 Functional Status Scale* –SPCFS-), a las seis semanas del alta hospitalaria por COVID (13).

| Síntomas cognitivos                |
|------------------------------------|
| Cognición global                   |
| <b>Concentración</b>               |
| <b>Memoria:</b>                    |
| <b>Memoria de trabajo</b>          |
| Memoria episódica verbal           |
| Memoria visual                     |
| <b>Función ejecutiva:</b>          |
| <b>Atención sostenida</b>          |
| <b>Velocidad de procesamiento</b>  |
| Procesamiento visuoespacial        |
| Lenguaje                           |
| Síntomas afectivos                 |
| <b>Ansiedad</b>                    |
| <b>Depresión</b>                   |
| Trastorno por estrés postraumático |
| Síntomas conductuales              |
| Irritabilidad                      |
| Alteración del sueño               |
| Otros síntomas                     |
| <b>Fatiga</b>                      |

**Tabla 1:** Perfil de síntomas cognitivos, afectivos y conductuales del paciente con deterioro cognitivo post-COVID (en negrita los síntomas más frecuentes).

### Correlación de los síntomas cognitivos con biomarcadores

Diversos estudios han investigado biomarcadores de daño neurológico en pacientes con COVID-19. Algunos de estos han demostrado que los pacientes con COVID-19 ingresados en UCI muestran concentraciones elevadas de proteína ácida fibrilar glial (GFAP) y neurofilamentos (NfL) en sangre (44,45), y que niveles altos de NfL se asociaron con mal pronóstico (44,46,47). Un estudio reciente realizado en 142 pacientes hospitalizados demostró que incluso los pacientes sin manifestaciones neurológicas tienen niveles elevados de NfL, y que niveles altos se relacionan con

mal pronóstico (47). Otro trabajo encontró niveles elevados de IL-4 y marcadores de daño neuronal en plasma en vesículas derivadas de neuronas en pacientes con síntomas neurológicos (48). Sin embargo, existen todavía pocos estudios que incluyan biomarcadores en pacientes explorados cognitivamente. Otro artículo reciente (41) que incluye 29 pacientes con COVID leve no encontró relación entre la función cognitiva y las concentraciones de diversas citoquinas en plasma, a pesar de que los pacientes con COVID presentaron déficits en la función ejecutiva.

Existen todavía pocos trabajos que incluyan exploraciones de neuroimagen en pacientes con deterioro cognitivo post-COVID. Estudios mediante resonancia magnética (RM) en pacientes tras el alta hospitalaria por COVID han detectado diversos hallazgos como aumento de señal y difusividad media en los tálamos e hiperintensidad en sustancia blanca periventricular (38). En nuestra experiencia, un hallazgo ocasional en estos pacientes es la dilatación de espacios perivasculares en regiones hipocampales y de los ganglios basales (Figura 2). Estos hallazgos podrían traducir signos de inflamación perivascular observados en estudios neuropatológicos (49).

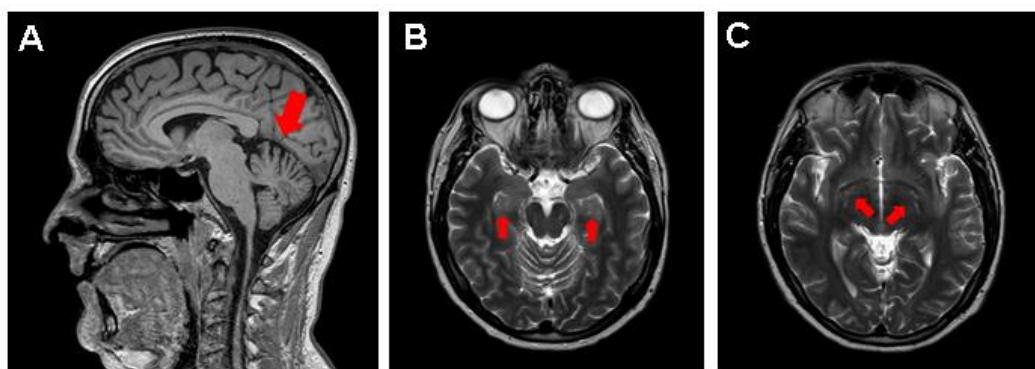

**Figura 2:** Hallazgos de resonancia magnética en un paciente joven con deterioro cognitivo post-COVID. A. Leve pérdida de volumen cerebelosa. B, C. Espacios perivasculares prominentes en ambos hipocampos (B) y ganglios basales (C).

En un estudio mediante PET-FDG cerebral en pacientes con COVID y síntomas cognitivos, se ha descrito un patrón de hipometabolismo en la circunvolución

olfatoria, regiones límbicas, hipocampo, tronco cerebral y cerebelo (50). En pacientes hospitalizados con síntomas neurológicos se han detectado alteraciones en 10 de 15 pacientes, con un patrón predominante de hipometabolismo frontoparietal que correlacionó con las puntuaciones de MoCA (51). En un estudio longitudinal de seguimiento a 6 meses, se observó mejoría de los hallazgos, aunque algunos de estos pacientes presentaron déficits metabólicos residuales (51).

## **Tratamiento**

La instauración de un tratamiento exige la correcta identificación previa de los síntomas cognitivos, y de la caracterización de la severidad de los mismos. La experiencia en el manejo a medio y largo plazo de síntomas cognitivos post-COVID es muy limitada. Las recomendaciones vigentes de tratamiento son las mismas que para otras entidades con perfil cognitivo similar como el síndrome de fatiga crónica. Parece razonable aconsejar un manejo multidisciplinar del tratamiento no farmacológico. El tratamiento se deberá individualizar según las necesidades de cada persona pero idealmente si se requiriese (por repercusión funcional del déficit cognitivo objetivado) se podrían plantear terapias como la estimulación cognitiva, rehabilitación del lenguaje si procede (sobre todo en pacientes con intubación orotraqueal prolongada), terapia ocupacional idealmente combinadas con fisioterapia o ejercicio físico supervisado (52). La incorporación gradual y/o la adecuación del puesto de trabajo de forma temporal o permanente también se debería evaluar en casos seleccionados, dado que ello podría favorecer la inserción laboral de estos pacientes. No existe hasta la fecha ningún tratamiento farmacológico aprobado para la indicación de síntomas cognitivos post-COVID. Tampoco existen trabajos específicamente realizados para apoyar el uso de suplementos nutricionales o micronutrientes, a pesar de que recientemente se ha publicado un trabajo que postula el posible beneficio de la luteolina, un flavonoide natural, por su potencial efecto antiinflamatorio y neuroprotector (53). Se desconoce todavía el papel de las vacunas para el manejo de los síntomas prolongados post-COVID incluyendo síntomas cognitivos. A su vez, es recomendable optimizar el tratamiento farmacológico y no farmacológico de la sintomatología

afectiva, en caso de coexistir, lo que puede resultar en un beneficio a nivel cognitivo, funcional y en la calidad de vida del paciente. En ocasiones puede ser necesario la acción conjunta de especialistas de psicología clínica y psiquiatría.

### **Impacto de la pandemia COVID en personas con demencia**

Las personas afectadas de demencias neurodegenerativas como la enfermedad de Alzheimer son población de alto riesgo para desarrollar formas graves de COVID. La mortalidad en este grupo de pacientes ha sido notablemente superior, en parte por una edad más avanzada, presencia de comorbilidades y no tener clara indicación de ciertos tratamientos de apoyo ventilatorio por la situación funcional previa. En los supervivientes de la infección se ha observado también un empeoramiento cognitivo y funcional en grado variable en relación a la severidad de la infección. Se ha descrito mayor apatía, agitación y conducta motora aberrante en sujetos con deterioro cognitivo ligero y demencia por enfermedad de Alzheimer en el contexto de pandemia por SARS-Cov2 independientemente de haber pasado o no la infección (54). Incluso en aquellos individuos no infectados ha existido un declive cognitivo y funcional probablemente en relación al aislamiento social y a la falta de acceso a centros de estimulación cognitiva (25,55). Todo ello ha impactado de forma muy negativa en la calidad de vida global de estos pacientes.

### **Infección por SARS-Cov2 como posible factor de riesgo para el desarrollo de enfermedades neurodegenerativas**

Además del deterioro cognitivo en fase aguda y subaguda de la infección o el agravamiento del deterioro cognitivo previo, se ha postulado si la infección por SARS-Cov2 puede ser un factor de riesgo para el futuro desarrollo de enfermedades neurodegenerativas en sujetos sanos (56).

La hipoperfusión cerebral descrita en la infección por SARS-Cov2 se cree que podría acelerar la agregación y depósito de  $\beta$ -amiloide ( $A\beta$ ) (3) y agregación y plegamiento anormal de otras proteínas como tau, TDP-43 y alfa-sinucleína (7). También se ha descrito que el SARS-Cov2 tendría potencial efecto para inducir la inhibición funcional de los receptores de acetilcolina y que podría favorecer la disregulación del equilibrio excitatorio-inhibitorio al existir expresión de receptores de ACE-2 en

neuronas glutamatérgicas y gabaérgicas (8). Se ha planteado que la posibilidad de transferencia sináptica y axonal retro o anterógrada de SARS-Cov2 pudiera conllevar una infiltración lenta y difusa de todo el SNC meses o años después de la infección perpetuando el daño (8). No obstante, no existen suficientes datos como para sustentar esta hipótesis y falta seguimiento a medio y largo plazo de personas que hayan pasado la infección que incluyan evaluaciones neuropsicológicas longitudinales y estudios de biomarcadores multimodales para poder conocer realmente si la infección puede conllevar un mayor riesgo de padecer enfermedades neurodegenerativas.

### **Conclusión y líneas futuras**

La evidencia actual demuestra que los síntomas cognitivos son frecuentes tras la infección por COVID-19, incluso en casos de COVID leve que no han requerido hospitalización o UCI. El perfil cognitivo consiste en una alteración de la función ejecutiva y en menor medida de la memoria, que evoluciona hacia una mejoría progresiva en la mayoría de los casos. No existe un tratamiento específico, aunque se aconseja estimulación cognitiva adaptada a las necesidades de cada individuo en casos donde la sintomatología tiene una repercusión funcional.

Es necesario realizar estudios con un seguimiento a largo plazo para determinar la prevalencia del deterioro cognitivo post-COVID y determinar el impacto sobre los sistemas públicos de salud, y cuantificar los recursos necesarios para su tratamiento. Esto permitirá valorar globalmente el impacto no sólo médico, sino laboral y económico de este tipo de secuela (57).

Existen estudios internacionales en marcha para poner en común los datos clínicos y de biomarcadores. La cooperación permitirá realizar investigaciones de más alta calidad, involucrando a científicos de diferentes campos (58). Algunos de estos estudios, liderados por la Universidad de Yale (COVID Mind Study) o la Asociación Americana de familiares de Alzheimer son ejemplos de trabajos que incluyen marcadores de imagen y de biofluidos. Esta información será crucial para determinar el alcance de la afectación cognitiva en el COVID, y el pronóstico a largo plazo.

## Bibliografia

1. Zubair AS, McAlpine LS, Gardin T, Farhadian S, Kuruvilla DE, Spudich S. Neuropathogenesis and Neurologic Manifestations of the Coronaviruses in the Age of Coronavirus Disease 2019: A Review. *JAMA Neurol* [Internet]. 2020 Aug 1;77(8):1018–27. Available from: <https://doi.org/10.1001/jamaneurol.2020.2065>
2. Solomon T. Neurological infection with SARS-CoV-2 — the story so far. *Nat Rev Neurol* [Internet]. 2021;17(2):65–6. Available from: <https://doi.org/10.1038/s41582-020-00453-w>
3. Miners S, Kehoe PG, Love S. Cognitive impact of COVID-19: looking beyond the short term. *Alzheimers Res Ther*. 2020 Dec;12(1):170. Available from: <https://doi.org/10.1186/s13195-020-00744-w>
4. Meinhardt J, Radke J, Dittmayer C, Franz J, Thomas C, Mothes R, et al. Olfactory transmucosal SARS-CoV-2 invasion as a port of central nervous system entry in individuals with COVID-19. *Nat Neurosci*. 2021 Feb;24(2):168–75. Available from: <https://doi.org/10.1038/s41593-020-00758-5>
5. Chen X, Laurent S, Onur OA, Kleineberg NN, Fink GR, Schweitzer F, et al. A systematic review of neurological symptoms and complications of COVID-19. *J Neurol*. 2021 Feb;268(2):392–402. Available from: <https://doi.org/10.1007/s00415-020-10067-3>
6. Al-Sarraj S, Troakes C, Hanley B, Osborn M, Richardson MP, Hotopf M, et al. Invited Review: The spectrum of neuropathology in COVID-19. *Neuropathol Appl Neurobiol*. 2021 Feb;47(1):3–16. Available from: <https://doi.org/10.1111/nan.12667>
7. Fotuhi M, Mian A, Meysami S, Raji CA. Neurobiology of COVID-19. *J Alzheimers Dis*. 2020;76(1):3–19. Available from: <https://doi.org/10.3233/JAD-200581>
8. Wang F, Kream RM, Stefano GB. Long-Term Respiratory and Neurological Sequelae of COVID-19. *Med Sci Monit Int Med J Exp Clin Res*. 2020 Nov;26:e928996. Available from: <https://doi.org/10.12659/MSM.928996>

9. Matschke J, Lütgehetmann M, Hagel C, Sperhake JP, Schröder AS, Edler C, et al. Neuropathology of patients with COVID-19 in Germany: a post-mortem case series. *Lancet Neurol.* 2020 Nov;19(11):919–29. Available from: [https://doi.org/10.1016/S1474-4422\(20\)30308-2](https://doi.org/10.1016/S1474-4422(20)30308-2)
10. Taquet M, Geddes JR, Husain M, Luciano S, Harrison PJ. 6-month neurological and psychiatric outcomes in 236 379 survivors of COVID-19: a retrospective cohort study using electronic health records. *The lancet Psychiatry.* 2021 May;8(5):416–27. Available from: [https://doi.org/10.1016/S2215-0366\(21\)00084-5](https://doi.org/10.1016/S2215-0366(21)00084-5)
11. Lleó A, Alcolea D. The cognitive aftermath of COVID-19. *Brain Commun* [Internet]. 2020 Jul 1;2(2). Available from: <https://doi.org/10.1093/braincomms/fcaa072>
12. Ritchie K, Chan D, Watermeyer T. The cognitive consequences of the COVID-19 epidemic: collateral damage? *Brain Commun.* 2020;2(2):fcaa069. Available from: <https://doi.org/10.1093/braincomms/fcaa069>
13. de Graaf MA, Antoni ML, Ter Kuile MM, Arbous MS, Duiniveld AJF, Feltkamp MCW, et al. Short-term outpatient follow-up of COVID-19 patients: A multidisciplinary approach. *EClinicalMedicine.* 2021 Feb;32:100731. Available from: <https://doi.org/10.1016/j.eclinm.2021.100731>
14. Townsend L, Dowds J, O'Brien K, Sheill G, Dyer AH, O'Kelly B, et al. Persistent Poor Health after COVID-19 Is Not Associated with Respiratory Complications or Initial Disease Severity. *Ann Am Thorac Soc.* 2021 Jun;18(6):997–1003. Available from: <https://doi.org/10.1513/AnnalsATS.202009-1175OC>
15. Stefano GB, Ptacek R, Ptackova H, Martin A, Kream RM. Selective Neuronal Mitochondrial Targeting in SARS-CoV-2 Infection Affects Cognitive Processes to Induce “Brain Fog” and Results in Behavioral Changes that Favor Viral Survival. Vol. 27, *Medical science monitor : international medical journal of experimental and clinical research.* 2021. p. e930886. Available from: <https://doi.org/0.12659/MSM.930886>
16. Garg M, Maralakunte M, Garg S, Dhooria S, Sehgal I, Bhalla AS, et al. The Conundrum of “Long-COVID-19”: A Narrative Review. *Int J Gen Med.* 2021;14:2491–506. Available from: <https://doi.org/10.2147/IJGM.S316708>



17. Moghimi N, Di Napoli M, Biller J, Siegler JE, Shekhar R, McCullough LD, et al. The Neurological Manifestations of Post-Acute Sequelae of SARS-CoV-2 infection. *Curr Neurol Neurosci Rep*. 2021 Jun;21(9):44. Available from: <https://doi.org/10.1007/s11910-021-01130-1>
18. Graham EL, Clark JR, Orban ZS, Lim PH, Szymanski AL, Taylor C, et al. Persistent neurologic symptoms and cognitive dysfunction in non-hospitalized Covid-19 “long haulers”. *Ann Clin Transl Neurol*. 2021 May;8(5):1073–85. Available from: <https://doi.org/10.1002/acn3.51350>
19. Garrigues E, Janvier P, Kherabi Y, Le Bot A, Hamon A, Gouze H, et al. Post-discharge persistent symptoms and health-related quality of life after hospitalization for COVID-19. Vol. 81, *The Journal of infection*. 2020. p. e4–6. Available from: <https://doi.org/10.1016/j.jinf.2020.08.029>
20. Herridge MS, Moss M, Hough CL, Hopkins RO, Rice TW, Bienvenu OJ, et al. Recovery and outcomes after the acute respiratory distress syndrome (ARDS) in patients and their family caregivers. *Intensive Care Med*. 2016 May;42(5):725–38. Available from: <https://doi.org/10.1007/s00134-016-4321-8>
21. Sasannejad C, Ely EW, Lahiri S. Long-term cognitive impairment after acute respiratory distress syndrome: a review of clinical impact and pathophysiological mechanisms. *Crit Care*. 2019 Nov;23(1):352. Available from: <https://doi.org/10.1186/s13054-019-2626-z>
22. Nakamura ZM, Nash RP, Laughon SL, Rosenstein DL. Neuropsychiatric Complications of COVID-19. *Curr Psychiatry Rep*. 2021 Mar;23(5):25. Available from: <https://doi.org/10.1007/s11920-021-01237-9>
23. Kotfis K, Williams Roberson S, Wilson JE, Dabrowski W, Pun BT, Ely EW. COVID-19: ICU delirium management during SARS-CoV-2 pandemic. *Crit Care*. 2020 Apr;24(1):176. Available from: <https://doi.org/10.1186/s13054-020-02882-x>
24. Hosey MM, Needham DM. Survivorship after COVID-19 ICU stay. *Nat Rev Dis Prim*. 2020 Jul;6(1):60. Available from: <https://doi.org/10.1038/s41572-020-0201-1>
25. Alonso-Lana S, Marquié M, Ruiz A, Boada M. Cognitive and Neuropsychiatric Manifestations of COVID-19 and Effects on Elderly Individuals With

- Dementia. *Front Aging Neurosci.* 2020;12:588872. Available from: <https://doi.org/10.3389/fnagi.2020.588872>
26. Almeria M, Cejudo JC, Sotoca J, Deus J, Krupinski J. Cognitive profile following COVID-19 infection: Clinical predictors leading to neuropsychological impairment. *Brain, Behav Immun - Heal.* 2020 Dec;9:100163. Available from: <https://doi.org/10.1016/j.bbih.2020.100163>
27. Helms J, Kremer S, Merdji H, Clere-Jehl R, Schenck M, Kummerlen C, et al. Neurologic Features in Severe SARS-CoV-2 Infection. Vol. 382, *The New England journal of medicine.* 2020. p. 2268–70. Available from: <https://doi.org/10.1056/NEJMc2008597>
28. Nikayin S, Rabiee A, Hashem MD, Huang M, Bienvenu OJ, Turnbull AE, et al. Anxiety symptoms in survivors of critical illness: a systematic review and meta-analysis. *Gen Hosp Psychiatry.* 2016;43:23–9. Available from: <https://doi.org/10.1016/j.genhosppsych.2016.08.005>
29. Rabiee A, Nikayin S, Hashem MD, Huang M, Dinglas VD, Bienvenu OJ, et al. Depressive Symptoms After Critical Illness: A Systematic Review and Meta-Analysis. *Crit Care Med.* 2016 Sep;44(9):1744–53. Available from: <https://doi.org/10.1097/CCM.0000000000001811>
30. Hellmuth J, Barnett TA, Asken BM, Kelly JD, Torres L, Stephens ML, et al. Persistent COVID-19-associated neurocognitive symptoms in non-hospitalized patients. *J Neurovirol.* 2021 Feb;27(1):191–5. Available from: <https://doi.org/10.1007/s13365-021-00954-4>
31. Blomberg B, Mohn KG-I, Brokstad KA, Zhou F, Linchausen DW, Hansen B-A, et al. Long COVID in a prospective cohort of home-isolated patients. *Nat Med.* 2021 Sep;27(9):1607–13. Available from: <https://doi.org/10.1038/s41591-021-01433-3>
32. Woo MS, Malsy J, Pöttgen J, Seddiq Zai S, Ufer F, Hadjilaou A, et al. Frequent neurocognitive deficits after recovery from mild COVID-19. *Brain Commun.* 2020;2(2):fcaa205. Available from: <https://doi.org/10.1093/braincomms/fcaa205>
33. Davis HE, Assaf GS, McCorkell L, Wei H, Low RJ, Re'em Y, et al. Characterizing long COVID in an international cohort: 7 months of symptoms and their impact. *EClinicalMedicine.* 2021 Jul;101019. Available from:

- <https://doi.org/10.1016/j.eclinm.2021.101019>
34. Del Brutto OH, Wu S, Mera RM, Costa AF, Recalde BY, Issa NP. Cognitive decline among individuals with history of mild symptomatic SARS-CoV-2 infection: A longitudinal prospective study nested to a population cohort. *Eur J Neurol*. 2021 Oct;28(10):3245–53. Available from: <https://doi.org/10.1111/ene.14775>
  35. Vanderlind WM, Rabinovitz BB, Miao IY, Oberlin LE, Bueno-Castellano C, Fridman C, et al. A systematic review of neuropsychological and psychiatric sequelae of COVID-19: implications for treatment. *Curr Opin Psychiatry*. 2021 Jul;34(4):420–33. Available from: <https://doi.org/10.1097/YCO.0000000000000713>
  36. Daroische R, Hemminghyth MS, Eilertsen TH, Breivte MH, Chwyszczuk LJ. Cognitive Impairment After COVID-19—A Review on Objective Test Data [Internet]. Vol. 12, *Frontiers in Neurology*. 2021. p. 1238. Available from: <https://doi.org/10.3389/fneur.2021.699582>
  37. Pistarini C, Fiabane E, Houdayer E, Vassallo C, Manera MR, Alemanno F. Cognitive and Emotional Disturbances Due to COVID-19: An Exploratory Study in the Rehabilitation Setting [Internet]. Vol. 12, *Frontiers in Neurology*. 2021. p.500. Available from: <https://doi.org/10.3389/fneur.2021.643646>
  38. Raman B, Cassar MP, Tunnicliffe EM, Filippini N, Griffanti L, Alfaro-Almagro F, et al. Medium-term effects of SARS-CoV-2 infection on multiple vital organs, exercise capacity, cognition, quality of life and mental health, post-hospital discharge. *EClinicalMedicine*. 2021 Jan;31:100683. Available from: <https://doi.org/10.1016/j.eclinm.2020.100683>
  39. De Lorenzo R, Conte C, Lanzani C, Benedetti F, Roveri L, Mazza MG, et al. Residual clinical damage after COVID-19: A retrospective and prospective observational cohort study. *PLoS One* [Internet]. 2020 Oct 14;15(10):e0239570. Available from: <https://doi.org/10.1371/journal.pone.0239570>
  40. Baig AM. Neurological manifestations in COVID-19 caused by SARS-CoV-2. Vol. 26, *CNS neuroscience & therapeutics*. 2020. p. 499–501. Available from: <https://doi.org/10.1111/cns.13372>
  41. Zhou H, Lu S, Chen J, Wei N, Wang D, Lyu H, et al. The landscape of cognitive

- function in recovered COVID-19 patients. *J Psychiatr Res.* 2020 Oct;129:98–102. Available from: <https://doi.org/10.1016/j.jpsychires.2020.06.022>
42. Weerahandi H, Hochman KA, Simon E, Blaum C, Chodosh J, Duan E, et al. Post-Discharge Health Status and Symptoms in Patients with Severe COVID-19. *J Gen Intern Med* [Internet]. 2021;36(3):738–45. Available from: <https://doi.org/10.1007/s11606-020-06338-4>
43. E. RA. Potential for Cognitive Communication Impairment in COVID-19 Survivors: A Call to Action for Speech-Language Pathologists. *Am J Speech-Language Pathol* [Internet]. 2020 Nov 12;29(4):1821–32. Available from: [https://doi.org/10.1044/2020\\_AJSLP-20-00147](https://doi.org/10.1044/2020_AJSLP-20-00147)
44. Sutter R, Hert L, De Marchis GM, Twerenbold R, Kappos L, Naegelin Y, et al. Serum Neurofilament Light Chain Levels in the Intensive Care Unit: Comparison between Severely Ill Patients with and without Coronavirus Disease 2019. *Ann Neurol.* 2021 Mar;89(3):610–6. Available from: <https://doi.org/10.1002/ana.26004>
45. Cooper J, Stukas S, Hoiland RL, Fergusson NA, Thiara S, Foster D, et al. Quantification of Neurological Blood-Based Biomarkers in Critically Ill Patients With Coronavirus Disease 2019. *Crit care Explor.* 2020 Oct;2(10):e0238. Available from: <https://doi.org/10.1097/CCE.0000000000000238>
46. Aamodt AH, Høgestøl EA, Popperud TH, Holter JC, Dyrhol-Riise AM, Tonby K, et al. Blood neurofilament light concentration at admittance: a potential prognostic marker in COVID-19. *J Neurol.* 2021 Mar;1–10. Available from: <https://doi.org/10.1007/s00415-021-10517-6>
47. Prudencio M, Erben Y, Marquez CP, Jansen-West KR, Franco-Mesa C, Heckman MG, et al. Serum neurofilament light protein correlates with unfavorable clinical outcomes in hospitalized patients with COVID-19. *Sci Transl Med.* 2021 Jul;13(602). Available from: <https://doi.org/10.1126/scitranslmed.abi7643>
48. Sun B, Tang N, Peluso MJ, Iyer NS, Torres L, Donatelli JL, et al. Characterization and Biomarker Analyses of Post-COVID-19 Complications and Neurological Manifestations. *Cells.* 2021 Feb;10(2). Available from: <https://doi.org/10.3390/cells10020386>

49. Lee M-H, Perl DP, Nair G, Li W, Maric D, Murray H, et al. Microvascular Injury in the Brains of Patients with Covid-19. *N Engl J Med* [Internet]. 2020 Dec 30;384(5):481–3. Available from: <https://doi.org/10.1056/NEJMc2033369>
50. Guedj E, Million M, Dudouet P, Tissot-Dupont H, Bregeon F, Cammilleri S, et al. (18)F-FDG brain PET hypometabolism in post-SARS-CoV-2 infection: substrate for persistent/delayed disorders? *Eur J Nucl Med Mol Imaging*. 2021 Feb;48(2):592–5. Available from: <https://doi.org/10.1007/s00259-020-04973-x>
51. Blazhenets G, Schroeter N, Bormann T, Thurow J, Wagner D, Frings L, et al. Slow but Evident Recovery from Neocortical Dysfunction and Cognitive Impairment in a Series of Chronic COVID-19 Patients. *J Nucl Med*. 2021 Jul;62(7):910–5. Available from: <https://doi.org/10.2967/jnumed.121.262128>
52. Humphreys H, Kilby L, Kudiersky N, Copeland R. Long COVID and the role of physical activity: a qualitative study. *BMJ Open*. 2021 Mar;11(3):e047632. Available from: <https://doi.org/10.1136/bmjopen-2020-047632>
53. Theoharides TC, Cholevas C, Polyzoidis K, Politis A. Long-COVID syndrome-associated brain fog and chemofog: Luteolin to the rescue. *Biofactors*. 2021 Mar;47(2):232–41. Available from: <https://doi.org/10.1002/biof.1726>
54. Lara B, Carnes A, Dakterzada F, Benitez I, Piñol-Ripoll G. Neuropsychiatric symptoms and quality of life in Spanish patients with Alzheimer's disease during the COVID-19 lockdown. *Eur J Neurol*. 2020 Sep;27(9):1744–7. Available from: <https://doi.org/10.1111/ene.14339>
55. Iodice F, Cassano V, Rossini PM. Direct and indirect neurological, cognitive, and behavioral effects of COVID-19 on the healthy elderly, mild-cognitive-impairment, and Alzheimer's disease populations. *Neurol Sci Off J Ital Neurol Soc Ital Soc Clin Neurophysiol*. 2021 Feb;42(2):455–65. Available from: <https://doi.org/10.1007/s10072-020-04902-8>
56. Heneka MT, Golenbock D, Latz E, Morgan D, Brown R. Immediate and long-term consequences of COVID-19 infections for the development of neurological disease. *Alzheimers Res Ther*. 2020 Jun;12(1):69. Available from: <https://doi.org/10.1186/s13195-020-00640-3>
57. Carod-Artal FJ. Post-COVID-19 syndrome: epidemiology, diagnostic criteria

- and pathogenic mechanisms involved. *Rev Neurol*. 2021 Jun;72(11):384–96.  
Available from: <https://doi.org/10.33588/rn.7211.2021230>
58. Hall PA, Sheeran P, Fong GT, Cheah CSL, Oremus M, Liu-Ambrose T, et al.  
Biobehavioral Aspects of the COVID-19 Pandemic: A Review. *Psychosom Med*.  
2021 May;83(4):309–21. Available from:  
<https://doi.org/10.1097/PSY.0000000000000932>
